# Supplementary material for: Clinical validation of molecular markers of macrocyclic lactone resistance in Dirofilaria immitis
Source: PubMed Central journal article supplement (PMC6288007; doi:10.1016/j.ijpddr.2018.06.006), 2018-07-18
Supplement: mmc2.pdf [file mmc2.pdf]

**Supporting File S5. SNP Positions and Primer Sequences.**

| SNP Position and Primer name | Primer Sequence                              |
|------------------------------|----------------------------------------------|
| scaf00001-466197-CS1F        | ACACTGACGACATGGTTCTACATTCTATCGAAAACCTTCCAG   |
| scaf00001-466197-CS2R        | TACGGTAGCAGAGACTTGGTCTAGGTTGCAAAGTTGCAATG    |
| scaf00005-662854-CS1F        | ACACTGACGACATGGTTCTACAGTTATTTGCACTACTCTCCC   |
| scaf00005-662854-CS2R        | TACGGTAGCAGAGACTTGGTCTTGGCGTACTGATCACATTGG   |
| scaf00046-222254-CS1F        | ACACTGACGACATGGTTCTACACATCGTTGTCAACTTCCTGC   |
| scaf00046-222254-CS2R        | TACGGTAGCAGAGACTTGGTCTGAAATTTGAAAATGGGTACT   |
| scaf00185-10639-CS1F         | ACACTGACGACATGGTTCTACAACGCAGGAAAGCTTTAATGG   |
| scaf00185-10639-CS2R         | TACGGTAGCAGAGACTTGGTCTATCATCATTTTTATCAATTCC  |
| scaf00185-62174-CS1F         | ACACTGACGACATGGTTCTACATCGATCATTTAGTAACAACG   |
| scaf00185-62174-CS2R         | TACGGTAGCAGAGACTTGGTCTTTGCGTTACAGCGCCAAATC   |
| scaf00004-79766-CS1F         | ACACTGACGACATGGTTCTACACGTGACTAAAAGAATAGTG    |
| scaf00004-79766-CS2R         | TACGGTAGCAGAGACTTGGTCTCAATTTAGGGATATGACACAG  |
| scaf00046-22857-CS1F         | ACACTGACGACATGGTTCTACACGAGGTAAAGCACACAGAAG   |
| scaf00046-22857-CS2R         | TACGGTAGCAGAGACTTGGTCTCAACAAAATGCCGCAGATGG   |
| scaf00046-76278-CS1F         | ACACTGACGACATGGTTCTACAGGCCAATAAATAAAGGCTA    |
| scaf00046-76278-CS2R         | TACGGTAGCAGAGACTTGGTCTGTTTTCTGGAATTATCAGAC   |
| scaf00140-30919-CS1F         | ACACTGACGACATGGTTCTACACGAAGAAGAACTTTTCGGG    |
| scaf00140-30919-CS2R         | TACGGTAGCAGAGACTTGGTCTGTACAATTAATTGCTGTTTCGC |
| scaf00597-12915-CS1F         | ACACTGACGACATGGTTCTACACGCTTGTTGATTACGACGC    |
| scaf00597-12915-CS2R         | TACGGTAGCAGAGACTTGGTCTATGGGGAATTATTACGTTGG   |
